# Supplementary material for: Altered White Matter Integrity in Human Immunodeficiency Virus-Associated Neurocognitive Disorder: A Tract-Based Spatial Statistics Study
Source: PubMed Central journal article supplement — Korean J Radiol. 2018 Apr 6;19(3):431–42. doi: 10.3348/kjr.2018.19.3.431 (PMC5904470; doi:10.3348/kjr.2018.19.3.431), 2018-04-06
Supplement: kjr-19-431-s001.pdf [file kjr-19-431-s001.pdf]

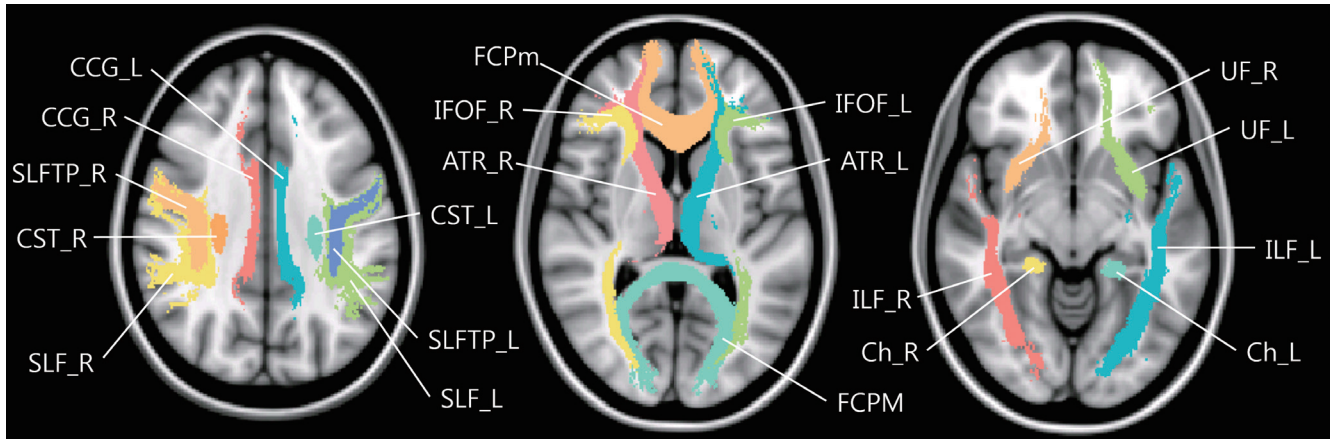

**Supplementary Fig. 1. 20 Johns Hopkins University white matter tractography atlas.** ATR = anterior thalamic radiation, CCG = cingulum (cingulate gyrus), Ch = cingulum (hippocampus), CST = corticospinal tract, FCPM = forceps major, FCPm = forceps minor, IFOF = inferior fronto-occipital fasciculus, ILF = inferior longitudinal fasciculus, L = left, R = right, SLF = superior longitudinal fasciculus, SLFTP = SLF temporal part, UF = uncinata fasciculus
